# Supplementary material for: Biosynthetic Pathway of Proanthocyanidins in Major Cash Crops
Source: MDPI journal article supplement (doi:10.3390/plants10091792), 2021-08-28
Supplement: s1 [file s1]

**Supplementary Table S1.** List of genes involved in the biosynthetic pathways of PAs, as searched from KEGG database. The protein sequences were downloaded from NCBI GenBank database (www.ncbi.nlm.nih.gov), and cross-checked with the reference genomic database of each species using BLASTP.

| Species | Query          | Length of query | Subject                                  | Length of subject | Enzymes | Percent identity | Alignments | Alignments/<br>subject length |
|---------|----------------|-----------------|------------------------------------------|-------------------|---------|------------------|------------|-------------------------------|
| AHP*    | XP_015956243.1 | 340             | AH03G35670.1                             | 321               | ANR     | 99               | 320        | 100                           |
| AHP*    | XP_015956243.1 | 340             | AH12G33420.1                             | 340               | ANR     | 98               | 340        | 100                           |
| AHP*    | XP_015964353.1 | 353             | AH05G08480.1                             | 353               | ANS     | 100              | 353        | 100                           |
| AHP*    | XP_015964353.1 | 353             | AH15G04650.1                             | 353               | ANS     | 100              | 353        | 100                           |
| AHP*    | XP_020981632.1 | 312             | AH16G40130.1                             | 345               | DFR     | 90               | 345        | 100                           |
| AHP*    | XP_015945945.1 | 517             | AH10G23440.1                             | 517               | F3'H    | 100              | 517        | 100                           |
| AHP*    | XP_015945945.1 | 517             | AH20G30480.1                             | 517               | F3'H    | 98               | 517        | 100                           |
| AHP*    | XP_015952032.1 | 366             | AH01G08350.1                             | 366               | F3H     | 100              | 366        | 100                           |
| AHP*    | XP_015952032.1 | 366             | AH11G00580.1                             | 366               | F3H     | 98               | 366        | 100                           |
| AHP*    | XP_015967593.1 | 351             | AH05G33160.1                             | 351               | LAR     | 99               | 351        | 100                           |
| AHP*    | XP_015967593.1 | 351             | AH15G19390.1                             | 351               | LAR     | 99               | 351        | 100                           |
| ATH     | NP_176365.1    | 340             | AT1G61720.1                              | 340               | ANR     | 100              | 340        | 100                           |
| ATH     | NP_001154266.1 | 153             | AT4G22870.2                              | 153               | ANS     | 100              | 153        | 100                           |
| ATH     | NP_001031700.1 | 356             | AT4G22880.1                              | 356               | ANS     | 100              | 356        | 100                           |
| ATH     | NP_199094.1    | 382             | AT5G42800.1                              | 382               | DFR     | 100              | 382        | 100                           |
| ATH     | NP_190692.1    | 358             | AT3G51240.1                              | 358               | F3H     | 100              | 358        | 100                           |
| ATH     | NP_196416.1    | 513             | AT5G07990.1                              | 513               | F3'H    | 100              | 513        | 100                           |
| FXA*    | XP_004309662.1 | 341             | maker-Fvb3-1-augustus-gene-304.62-mRNA-1 | 339               | ANR     | 98               | 339        | 100                           |
| FXA*    | XP_004309662.1 | 341             | maker-Fvb3-2-augustus-gene-20.53-mRNA-1  | 339               | ANR     | 98               | 339        | 100                           |
| FXA*    | XP_004298720.1 | 383             | maker-Fvb5-1-augustus-gene-7.57-mRNA-1   | 383               | ANS     | 98               | 383        | 100                           |
| FXA*    | XP_004298720.1 | 383             | maker-Fvb5-2-augustus-gene-6.69-mRNA-1   | 397               | ANS     | 95               | 393        | 99                            |
| FXA*    | XP_004298720.1 | 383             | maker-Fvb5-3-augustus-gene-266.54-mRNA-1 | 383               | ANS     | 97               | 383        | 100                           |
| FXA*    | XP_004287814.1 | 364             | maker-Fvb1-1-augustus-gene-217.34-mRNA-1 | 364               | F3H     | 99               | 364        | 100                           |
| FXA*    | XP_004287814.1 | 364             | maker-Fvb1-2-augustus-gene-78.37-mRNA-1  | 364               | F3H     | 98               | 364        | 100                           |
| FXA*    | XP_004287814.1 | 364             | maker-Fvb1-3-augustus-gene-64.31-mRNA-1  | 364               | F3H     | 98               | 364        | 100                           |
| FXA*    | XP_004287814.1 | 364             | maker-Fvb1-4-augustus-gene-56.40-mRNA-1  | 364               | F3H     | 100              | 364        | 100                           |

|      |                |     |                                          |     |        |     |     |     |
|------|----------------|-----|------------------------------------------|-----|--------|-----|-----|-----|
| FXA* | XP_004297144.2 | 350 | maker-Fvb4-1-augustus-gene-155.24-mRNA-1 | 350 | LAR    | 97  | 350 | 100 |
| FXA* | XP_004297144.2 | 350 | maker-Fvb4-2-augustus-gene-44.51-mRNA-1  | 350 | LAR    | 98  | 350 | 100 |
| FXA* | XP_004297144.2 | 350 | maker-Fvb4-3-augustus-gene-49.40-mRNA-1  | 350 | LAR    | 100 | 350 | 100 |
| FXA* | XP_004297144.2 | 350 | maker-Fvb4-4-augustus-gene-44.47-mRNA-1  | 350 | LAR    | 98  | 350 | 100 |
| GMX  | NP_001241913.2 | 337 | glyma.Wm82.gnm4.ann1.Glyma.08G062000.1   | 337 | ANR    | 100 | 337 | 100 |
| GMX  | NP_001243072.1 | 338 | glyma.Wm82.gnm4.ann1.Glyma.08G062100.2   | 338 | ANR    | 100 | 338 | 100 |
| GMX  | NP_001240884.1 | 352 | glyma.Wm82.gnm4.ann1.Glyma.11G027700.1   | 352 | ANS    | 100 | 352 | 100 |
| GMX  | NP_001239794.1 | 352 | glyma.Wm82.gnm4.ann1.Glyma.01G214200.1   | 352 | ANS    | 100 | 352 | 100 |
| GMX  | NP_001239696.1 | 339 | glyma.Wm82.gnm4.ann1.Glyma.02G158700.1   | 339 | DFR    | 100 | 339 | 100 |
| GMX  | NP_001238612.2 | 348 | glyma.Wm82.gnm4.ann1.Glyma.14G072700.1   | 348 | DFR    | 100 | 348 | 100 |
| GMX  | NP_001341095.1 | 354 | glyma.Wm82.gnm4.ann1.Glyma.17G252200.3   | 354 | DFR    | 100 | 354 | 100 |
| GMX  | XP_003520255.1 | 376 | glyma.Wm82.gnm4.ann1.Glyma.02G048600.1   | 376 | F3H    | 100 | 376 | 100 |
| GMX  | XP_003547939.1 | 372 | glyma.Wm82.gnm4.ann1.Glyma.16G128700.1   | 372 | F3H    | 100 | 372 | 100 |
| GMX  | XP_003517175.1 | 365 | glyma.Wm82.gnm4.ann1.Glyma.01G166200.1   | 365 | F3H    | 100 | 365 | 100 |
| GMX  | NP_001236797.1 | 375 | glyma.Wm82.gnm4.ann1.Glyma.02G048400.3   | 375 | F3H    | 100 | 375 | 100 |
| GMX  | XP_014632702.1 |     |                                          | N/A |        |     |     |     |
| GMX  | NP_001236632.2 | 509 | glyma.Wm82.gnm4.ann1.Glyma.13G072100.1   | 467 | F3`5`H | 99  | 463 | 99  |
| GMX  | XP_003525447.1 | 513 | glyma.Wm82.gnm4.ann1.Glyma.05G021800.1   | 513 | F3`H   | 100 | 513 | 100 |
| GMX  | XP_003525448.1 | 512 | glyma.Wm82.gnm4.ann1.Glyma.05G021900.1   | 512 | F3`H   | 100 | 512 | 100 |
| GMX  | XP_003525450.1 | 511 | glyma.Wm82.gnm4.ann1.Glyma.05G022100.1   | 511 | F3`H   | 100 | 511 | 100 |
| GMX  | XP_014624961.2 | 633 | glyma.Wm82.gnm4.ann1.Glyma.17G077700.3   | 519 | F3`H   | 99  | 515 | 99  |
| GMX  | NP_001237015.1 | 513 | glyma.Wm82.gnm4.ann1.Glyma.06G202300.1   | 513 | F3`H   | 100 | 513 | 100 |
| GMX  | NP_001352050.1 | 365 | glyma.Wm82.gnm4.ann1.Glyma.20G185700.2   | 257 | LAR    | 100 | 257 | 100 |
| GMX  | XP_003536310.1 | 363 | glyma.Wm82.gnm4.ann1.Glyma.10G204800.2   | 363 | LAR    | 100 | 363 | 100 |
| MDM  | NP_001280930.1 | 339 | MD05G1335600                             | 339 | ANR    | 99  | 339 | 100 |
| MDM  | XP_028966264.1 | 339 | MD10G1311100                             | 339 | ANR    | 100 | 339 | 100 |
| MDM  | NP_001280767.1 | 357 | MD06G1071600                             | 357 | ANS    | 100 | 357 | 100 |
| MDM  | NP_001315877.1 | 357 | MD03G1001100                             | 410 | ANS    | 99  | 357 | 87  |
| MDM  | NP_001280868.1 | 348 | MD15G1024100                             | 348 | DFR    | 100 | 348 | 100 |
| MDM  | XP_008377381.2 | 347 | MD08G1028600                             | 347 | DFR    | 100 | 347 | 100 |

|     |                |     |                      |     |        |     |     |     |
|-----|----------------|-----|----------------------|-----|--------|-----|-----|-----|
| MDM | NP_001280854.1 | 365 | MD02G1132200         | 365 | F3H    | 99  | 365 | 100 |
| MDM | NP_001280883.1 | 365 | MD15G1246200         | 365 | F3H    | 100 | 365 | 100 |
| MDM | XP_008374610.1 | 511 | MD06G1201700         | 511 | F3`H   | 100 | 511 | 100 |
| MDM | XP_008393217.2 | 511 | MD14G1210700         | 511 | F3`H   | 100 | 511 | 100 |
| MDM | NP_001280789.1 | 349 | MD13G1046900         | 422 | LAR    | 99  | 349 | 83  |
| MDM | NP_001281043.1 | 354 | MD16G1048500         | 354 | LAR    | 100 | 354 | 100 |
| PVU | XP_007159212.1 | 337 | Phvul.002G218600.1.p | 337 | ANR    | 100 | 337 | 100 |
| PVU | XP_007159213.1 | 337 | Phvul.002G218700.1.p | 337 | ANR    | 100 | 337 | 100 |
| PVU | XP_007158443.1 | 353 | Phvul.002G152700.1.p | 353 | ANS    | 100 | 353 | 100 |
| PVU | XP_007160734.1 | 354 | Phvul.001G012700.1.p | 354 | DFR    | 100 | 354 | 100 |
| PVU | XP_007160735.1 | 339 | Phvul.001G012800.1.p | 339 | DFR    | 100 | 339 | 100 |
| PVU | XP_007145529.1 | 329 | Phvul.007G246200.1.p | 329 | DFR    | 100 | 329 | 100 |
| PVU | XP_007156141.1 | 365 | Phvul.003G261900.1.p | 365 | F3H    | 100 | 365 | 100 |
| PVU | XP_007146174.1 | 528 | Phvul.006G018800.3.p | 385 | F3`5`H | 99  | 335 | 87  |
| PVU | XP_007146137.1 | 505 | Phvul.006G015400.2.p | 452 | F3`5`H | 100 | 452 | 100 |
| PVU | XP_007155243.1 | 364 | Phvul.003G185500.3.p | 368 | F3`H   | 100 | 364 | 99  |
| PVU | XP_007138248   |     |                      | N/A |        |     |     |     |
| PVU | XP_007143793.1 | 366 | Phvul.007G102100.1.p | 348 | LAR    | 94  | 366 | 105 |
| TCC | XP_007025907.2 | 336 | Thecc.06G207800.1.p  | 336 | ANR    | 100 | 336 | 100 |
| TCC | XP_007040068.2 | 354 | Thecc.03G267700.1.p  | 354 | ANS    | 99  | 354 | 100 |
| TCC | XP_007017586.2 | 345 | Thecc.08G030500.1.p  | 345 | DFR    | 99  | 345 | 100 |
| TCC | XP_017985307.1 |     |                      | N/A |        |     |     |     |
| TCC | XP_007046698.1 | 364 | Thecc.01G018700.1.p  | 364 | F3H    | 100 | 364 | 100 |
| TCC | XP_007015255.2 | 508 | Thecc.09G247100.1.p  | 508 | F3`5`H | 99  | 508 | 100 |
| TCC | XP_007037548.1 | 507 | Thecc.03G100400.1.p  | 507 | F3`H   | 100 | 507 | 100 |
| TCC | XP_017971349.1 | 339 | Thecc.02G361400.1.p  | 339 | LAR    | 100 | 339 | 100 |
| TCC | XP_017973773.1 | 359 | Thecc.03G028300.1.p  | 359 | LAR    | 100 | 359 | 100 |
| VVI | NP_001268147.1 | 355 | VIT_202s0025g04720.1 | 355 | ANS    | 100 | 355 | 100 |
| VVI | NP_001268144.1 | 337 | VIT_218s0001g12800.1 | 375 | DFR    | 100 | 337 | 90  |
| VVI | XP_010664947.2 | 402 | VIT_218s0001g12820.1 | 346 | DFR    | 100 | 346 | 100 |

|     |                |     |                      |     |        |     |     |     |
|-----|----------------|-----|----------------------|-----|--------|-----|-----|-----|
| VVI | XP_019071960.1 | 339 | VIT_218s0001g12810.1 | 410 | DFR    | 100 | 337 | 82  |
| VVI | NP_001268034.1 | 363 | VIT_204s0023g03370.1 | 363 | F3H    | 100 | 363 | 100 |
| VVI | XP_002275563.1 | 358 | VIT_218s0001g14310.1 | 358 | F3H    | 100 | 358 | 100 |
| VVI | NP_001268157.1 | 508 | VIT_206s0009g02840.1 | 508 | F3`5`H | 99  | 508 | 100 |
| VVI | XP_003632242.1 | 508 | VIT_206s0009g03110.1 | 508 | F3`5`H | 99  | 508 | 100 |
| VVI | XP_010651674.1 | 404 | VIT_206s0009g02920.1 | 390 | F3`5`H | 99  | 305 | 78  |
| VVI | XP_003632212.1 | 508 | VIT_206s0009g02970.1 | 508 | F3`5`H | 100 | 508 | 100 |
| VVI | XP_010651527.1 | 508 | VIT_206s0009g02840.1 | 508 | F3`5`H | 100 | 508 | 100 |
| VVI | XP_019075997.1 | 442 | VIT_206s0009g02860.1 | 508 | F3`5`H | 97  | 422 | 83  |
| VVI | XP_010651523.1 | 508 | VIT_206s0009g02840.1 | 508 | F3`5`H | 97  | 508 | 100 |
| VVI | XP_002280939.1 | 508 | VIT_206s0009g02860.1 | 508 | F3`5`H | 97  | 508 | 100 |
| VVI | XP_002271739.1 | 513 | VIT_208s0007g05160.1 | 552 | F3`5`H | 100 | 513 | 93  |
| VVI | XP_010651525.1 | 508 | VIT_206s0009g02860.1 | 508 | F3`5`H | 100 | 508 | 100 |
| VVI | XP_003632209.1 | 508 | VIT_206s0009g03110.1 | 508 | F3`5`H | 100 | 508 | 100 |
| VVI | XP_002280662.3 | 509 | VIT_206s0009g03140.1 | 511 | F3`5`H | 100 | 509 | 100 |
| VVI | NP_001268164.1 | 508 | VIT_206s0009g02840.1 | 508 | F3`5`H | 97  | 508 | 100 |
| VVI | NP_001267916.1 | 509 | VIT_217s0000g07200.1 | 509 | F3`H   | 99  | 509 | 100 |
| VVI | XP_002284151.1 | 509 | VIT_217s0000g07210.1 | 358 | F3`H   | 100 | 358 | 100 |
| VVI | NP_001268089.1 | 362 | VIT_217s0000g04150.2 | 358 | LAR    | 98  | 362 | 101 |
| VVI | NP_001267887.1 | 346 | VIT_201s0011g02960.1 | 346 | LAR    | 100 | 346 | 100 |

AHP\*, FXA\*: The genes had been reported from the relative wild species of strawberry (*Fragaria x vesca*) and peanut (*Arachis duranensis*) in KEGG database.

PAs: proanthocyanidins, NCBI: National Center for Biotechnology Information, KEGG: Kyoto Encyclopedia of Genes and Genomes.

**Supplementary Table S2.** Identification of orthologous genes involved in PAs biosynthetic pathways A total of 108 genes were detected in the eight species. Protein sequences were downloaded from the NCBI GenBank database ([www.ncbi.nlm.nih.gov](http://www.ncbi.nlm.nih.gov)), and orthologs were searched based on sequence identity from the reference genomic database of each species using BLASTP.

| Species of query | Query          | Length of query | Species of DB | Subject                                        | Length of DB | Name of enzyme | Percent identity | Alignments | Alignments/subject length |
|------------------|----------------|-----------------|---------------|------------------------------------------------|--------------|----------------|------------------|------------|---------------------------|
| GMX              | NP_001341095.1 | 354             | AHP           | AH16G40140.1                                   | 230          | DFR            | 74               | 225        | 98                        |
| MDM              | NP_001280930.1 | 339             | CSS           | TEA009266.1                                    | 349          | ANR            | 79               | 333        | 95                        |
| TCC              | XP_007025907.2 | 336             | CSS           | TEA022960.1                                    | 341          | ANR            | 81               | 340        | 100                       |
| VVI              | NP_001268147.1 | 355             | CSS           | TEA010322.1                                    | 307          | ANS            | 85               | 307        | 100                       |
| TCC              | XP_007040068.2 | 354             | CSS           | TEA015762.1                                    | 357          | ANS            | 77               | 316        | 89                        |
| TCC              | XP_007040068.2 | 354             | CSS           | TEA015769.1                                    | 575          | ANS            | 82               | 346        | 60                        |
| VVI              | XP_019071960.1 | 339             | CSS           | TEA023829.1                                    | 344          | DFR            | 68               | 322        | 94                        |
| VVI              | XP_019071960.1 | 339             | CSS           | TEA024758.1                                    | 343          | DFR            | 69               | 334        | 97                        |
| MDM              | NP_001280868.1 | 348             | CSS           | TEA032730.1                                    | 334          | DFR            | 77               | 325        | 97                        |
| VVI              | XP_010651525.1 | 508             | CSS           | TEA013315.1                                    | 486          | F3`5`H         | 78               | 509        | 105                       |
| VVI              | XP_002271739.1 | 513             | CSS           | TEA026294.1                                    | 506          | F3`5`H         | 76               | 502        | 99                        |
| VVI              | XP_002271739.1 | 513             | CSS           | TEA026296.1                                    | 506          | F3`5`H         | 76               | 502        | 99                        |
| VVI              | XP_003632209.1 | 508             | CSS           | TEA034021.1                                    | 470          | F3`5`H         | 66               | 503        | 107                       |
| VVI              | XP_010651525.1 | 508             | CSS           | TEA034051.1                                    | 507          | F3`5`H         | 67               | 502        | 99                        |
| VVI              | NP_001267916.1 | 509             | CSS           | TEA006847.1                                    | 518          | F3`H           | 80               | 516        | 100                       |
| VVI              | XP_002275563.1 | 358             | CSS           | TEA023790.1                                    | 368          | F3H            | 91               | 332        | 90                        |
| GMX              | XP_003520255.1 | 376             | CSS           | TEA034016.1                                    | 320          | F3H            | 77               | 123        | 38                        |
| VVI              | NP_001268089.1 | 362             | CSS           | TEA021535.1                                    | 398          | LAR            | 70               | 326        | 82                        |
| TCC              | XP_017971349.1 | 339             | CSS           | TEA026458.1                                    | 326          | LAR            | 71               | 316        | 97                        |
| TCC              | XP_017971349.1 | 339             | CSS           | TEA027582.1                                    | 334          | LAR            | 70               | 339        | 101                       |
| MDM              | NP_001280868.1 | 348             | FXA           | maker-Fvb2-1-augustus-gene-255.45-mRNA-1       | 350          | DFR            | 84               | 348        | 99                        |
| MDM              | NP_001280868.1 | 348             | FXA           | maker-Fvb2-3-augustus-gene-33.39-mRNA-1        | 341          | DFR            | 82               | 328        | 96                        |
| MDM              | NP_001280868.1 | 348             | FXA           | maker-Fvb2-4-snap-gene-258.87-mRNA-1           | 355          | DFR            | 80               | 328        | 92                        |
| MDM              | NP_001280868.1 | 348             | FXA           | snap_masked-Fvb2-3-processed-gene-33.26-mRNA-1 | 368          | DFR            | 81               | 366        | 99                        |

|     |                |     |     |                                                        |     |        |    |     |     |
|-----|----------------|-----|-----|--------------------------------------------------------|-----|--------|----|-----|-----|
| MDM | XP_008393217.2 | 511 | FXA | augustus_masked-Fvb5-2-processed-gene-78.0-mRNA-1      | 794 | F3`H   | 85 | 501 | 63  |
| MDM | XP_008393217.2 | 511 | FXA | maker-Fvb5-1-augustus-gene-87.57-mRNA-1                | 512 | F3`H   | 84 | 513 | 100 |
| MDM | XP_008393217.2 | 511 | FXA | snap_masked-Fvb5-3-processed-gene-202.30-mRNA-1        | 608 | F3`H   | 76 | 323 | 53  |
| MDM | NP_001280930.1 | 339 | PDU | Prudu_010859_v1.0                                      | 624 | ANR    | 90 | 339 | 54  |
| MDM | NP_001280767.1 | 357 | PDU | Prudu_014083_v1.0                                      | 381 | ANS    | 92 | 357 | 94  |
| MDM | XP_008377381.2 | 347 | PDU | Prudu_003295_v1.0                                      | 344 | DFR    | 86 | 344 | 100 |
| TCC | XP_017973773.1 | 359 | PDU | Prudu_015133_v1.0                                      | 337 | LAR    | 69 | 330 | 98  |
| VVI | XP_019075997.1 | 442 | VCC | augustus_masked-VaccDscf1-processed-gene-340.3-mRNA-1  | 813 | F3`5`H | 68 | 409 | 50  |
| MDM | NP_001280930.1 | 339 | VCC | maker-VaccDscf133-augustus-gene-0.14-mRNA-1            | 333 | ANR    | 82 | 332 | 100 |
| MDM | NP_001280930.1 | 339 | VCC | maker-VaccDscf15-augustus-gene-178.21-mRNA-1           | 333 | ANR    | 82 | 332 | 100 |
| MDM | NP_001280930.1 | 339 | VCC | maker-VaccDscf19-augustus-gene-256.19-mRNA-1           | 333 | ANR    | 81 | 332 | 100 |
| MDM | NP_001280930.1 | 339 | VCC | maker-VaccDscf24-augustus-gene-201.24-mRNA-1           | 355 | ANR    | 77 | 354 | 100 |
| TCC | XP_007040068.2 | 354 | VCC | maker-VaccDscf22-augustus-gene-131.24-mRNA-1           | 362 | ANS    | 82 | 355 | 98  |
| TCC | XP_007040068.2 | 354 | VCC | maker-VaccDscf43-augustus-gene-236.29-mRNA-1           | 360 | ANS    | 82 | 355 | 99  |
| TCC | XP_007040068.2 | 354 | VCC | maker-VaccDscf46-augustus-gene-11.23-mRNA-1            | 360 | ANS    | 82 | 355 | 99  |
| VVI | NP_001268144.1 | 337 | VCC | augustus_masked-VaccDscf13-processed-gene-166.8-mRNA-1 | 345 | DFR    | 79 | 330 | 96  |
| VVI | XP_019071960.1 | 339 | VCC | augustus_masked-VaccDscf1613-processed-gene-0.0-mRNA-1 | 336 | DFR    | 71 | 336 | 100 |
| VVI | NP_001268144.1 | 337 | VCC | augustus_masked-VaccDscf32-processed-gene-199.0-mRNA-1 | 363 | DFR    | 75 | 348 | 96  |
| VVI | NP_001268144.1 | 337 | VCC | augustus_masked-VaccDscf42-processed-gene-96.9-mRNA-1  | 363 | DFR    | 75 | 348 | 96  |
| VVI | XP_019071960.1 | 339 | VCC | maker-VaccDscf12-snap-gene-66.28-mRNA-1                | 695 | DFR    | 72 | 336 | 48  |
| TCC | XP_007017586.2 | 345 | VCC | maker-VaccDscf30-augustus-gene-208.37-mRNA-1           | 243 | DFR    | 80 | 221 | 91  |
| VVI | XP_019075997.1 | 442 | VCC | augustus_masked-VaccDscf1-processed-gene-55.4-mRNA-1   | 211 | F3`5`H | 82 | 211 | 100 |
| VVI | XP_002271739.1 | 513 | VCC | augustus_masked-VaccDscf21-processed-gene-             | 508 | F3`5`H | 72 | 512 | 101 |

| 326.1-mRNA-1 |                |     |     |                                                         |      |        |    |     |     |
|--------------|----------------|-----|-----|---------------------------------------------------------|------|--------|----|-----|-----|
| VVI          | XP_019075997.1 | 442 | VCC | augustus_masked-VaccDscaff26-processed-gene-34.8-mRNA-1 | 375  | F3`5`H | 82 | 211 | 56  |
| VVI          | NP_001268164.1 | 508 | VCC | maker-VaccDscaff1-augustus-gene-56.30-mRNA-1            | 333  | F3`5`H | 77 | 333 | 100 |
| VVI          | XP_003632212.1 | 508 | VCC | maker-VaccDscaff1-snap-gene-55.44-mRNA-1                | 1440 | F3`5`H | 77 | 512 | 36  |
| TCC          | XP_007015255.2 | 508 | VCC | maker-VaccDscaff10-augustus-gene-348.25-mRNA-1          | 512  | F3`5`H | 76 | 510 | 100 |
| VVI          | XP_003632212.1 | 508 | VCC | maker-VaccDscaff10-augustus-gene-349.23-mRNA-1          | 512  | F3`5`H | 76 | 512 | 100 |
| VVI          | XP_019075997.1 | 442 | VCC | maker-VaccDscaff10-augustus-gene-94.16-mRNA-1           | 455  | F3`5`H | 68 | 420 | 92  |
| VVI          | NP_001268164.1 | 508 | VCC | maker-VaccDscaff10-snap-gene-348.34-mRNA-1              | 1499 | F3`5`H | 76 | 512 | 34  |
| TCC          | XP_007015255.2 | 508 | VCC | maker-VaccDscaff11-augustus-gene-60.22-mRNA-1           | 512  | F3`5`H | 72 | 512 | 100 |
| VVI          | XP_003632242.1 | 508 | VCC | maker-VaccDscaff11-snap-gene-61.32-mRNA-1               | 461  | F3`5`H | 69 | 510 | 111 |
| TCC          | XP_007015255.2 | 508 | VCC | maker-VaccDscaff15-augustus-gene-67.31-mRNA-1           | 512  | F3`5`H | 73 | 512 | 100 |
| TCC          | XP_007015255.2 | 508 | VCC | maker-VaccDscaff15-augustus-gene-68.25-mRNA-1           | 516  | F3`5`H | 73 | 510 | 99  |
| TCC          | XP_007015255.2 | 508 | VCC | maker-VaccDscaff15-augustus-gene-68.26-mRNA-1           | 516  | F3`5`H | 73 | 510 | 99  |
| TCC          | XP_007015255.2 | 508 | VCC | maker-VaccDscaff19-augustus-gene-162.21-mRNA-1          | 512  | F3`5`H | 73 | 512 | 100 |
| TCC          | XP_007015255.2 | 508 | VCC | maker-VaccDscaff19-augustus-gene-162.22-mRNA-1          | 510  | F3`5`H | 73 | 510 | 100 |
| TCC          | XP_007015255.2 | 508 | VCC | maker-VaccDscaff24-augustus-gene-335.35-mRNA-1          | 512  | F3`5`H | 73 | 512 | 100 |
| VVI          | XP_003632209.1 | 508 | VCC | maker-VaccDscaff24-augustus-gene-336.30-mRNA-1          | 510  | F3`5`H | 73 | 510 | 100 |
| VVI          | XP_002271739.1 | 513 | VCC | maker-VaccDscaff26-augustus-gene-318.27-mRNA-1          | 508  | F3`5`H | 72 | 512 | 101 |
| VVI          | XP_010651674.1 | 404 | VCC | maker-VaccDscaff26-snap-gene-34.47-mRNA-1               | 183  | F3`5`H | 71 | 191 | 104 |
| VVI          | XP_003632212.1 | 508 | VCC | maker-VaccDscaff26-snap-gene-34.48-mRNA-1               | 1013 | F3`5`H | 77 | 512 | 51  |
| VVI          | XP_002271739.1 | 513 | VCC | maker-VaccDscaff29-augustus-gene-305.28-mRNA-1          | 508  | F3`5`H | 72 | 512 | 101 |
| VVI          | XP_019075997.1 | 442 | VCC | maker-VaccDscaff29-augustus-gene-34.34-mRNA-1           | 211  | F3`5`H | 81 | 211 | 100 |
| TCC          | XP_007015255.2 | 508 | VCC | maker-VaccDscaff29-snap-gene-34.40-mRNA-1               | 632  | F3`5`H | 73 | 330 | 52  |
| VVI          | XP_003632212.1 | 508 | VCC | maker-VaccDscaff5-augustus-gene-36.29-mRNA-1            | 601  | F3`5`H | 76 | 512 | 85  |
| VVI          | XP_019075997.1 | 442 | VCC | maker-VaccDscaff5-augustus-gene-37.34-mRNA-1            | 215  | F3`5`H | 80 | 171 | 80  |
| TCC          | XP_007015255.2 | 508 | VCC | maker-VaccDscaff5-augustus-gene-37.35-mRNA-1            | 512  | F3`5`H | 77 | 510 | 100 |
| VVI          | XP_003632212.1 | 508 | VCC | maker-VaccDscaff5-augustus-gene-37.39-mRNA-1            | 512  | F3`5`H | 76 | 512 | 100 |
| TCC          | XP_007015255.2 | 508 | VCC | maker-VaccDscaff5-augustus-gene-49.26-mRNA-1            | 511  | F3`5`H | 76 | 510 | 100 |
| TCC          | XP_007015255.2 | 508 | VCC | maker-VaccDscaff5-snap-gene-37.45-mRNA-1                | 1232 | F3`5`H | 76 | 510 | 41  |

|     |                |     |     |                                                       |      |        |    |     |     |
|-----|----------------|-----|-----|-------------------------------------------------------|------|--------|----|-----|-----|
| TCC | XP_007015255.2 | 508 | VCC | maker-VaccDscf8-augustus-gene-360.23-mRNA-1           | 512  | F3'5'H | 77 | 510 | 100 |
| VVI | XP_003632212.1 | 508 | VCC | maker-VaccDscf8-augustus-gene-361.35-mRNA-1           | 512  | F3'5'H | 78 | 512 | 100 |
| VVI | XP_003632212.1 | 508 | VCC | maker-VaccDscf8-snap-gene-360.28-mRNA-1               | 1021 | F3'5'H | 77 | 512 | 50  |
| VVI | XP_003632212.1 | 508 | VCC | maker-VaccDscf8-snap-gene-361.42-mRNA-1               | 537  | F3'5'H | 76 | 512 | 95  |
| VVI | XP_003632242.1 | 508 | VCC | snap_masked-VaccDscf5-processed-gene-318.17-mRNA-1    | 388  | F3'5'H | 69 | 411 | 106 |
| VVI | XP_019075997.1 | 442 | VCC | snap_masked-VaccDscf8-processed-gene-361.12-mRNA-1    | 176  | F3'5'H | 82 | 176 | 100 |
| VVI | NP_001267916.1 | 509 | VCC | maker-VaccDscf13-augustus-gene-238.27-mRNA-1          | 533  | F3'H   | 81 | 514 | 96  |
| VVI | NP_001267916.1 | 509 | VCC | maker-VaccDscf30-augustus-gene-161.25-mRNA-1          | 516  | F3'H   | 80 | 514 | 100 |
| VVI | NP_001267916.1 | 509 | VCC | maker-VaccDscf32-augustus-gene-159.26-mRNA-1          | 536  | F3'H   | 80 | 519 | 97  |
| VVI | NP_001267916.1 | 509 | VCC | maker-VaccDscf42-augustus-gene-154.36-mRNA-1          | 516  | F3'H   | 80 | 514 | 100 |
| VVI | NP_001268034.1 | 363 | VCC | augustus_masked-VaccDscf42-processed-gene-20.3-mRNA-1 | 359  | F3H    | 85 | 363 | 101 |
| VVI | NP_001268034.1 | 363 | VCC | maker-VaccDscf13-augustus-gene-41.36-mRNA-1           | 359  | F3H    | 85 | 363 | 101 |
| VVI | NP_001268034.1 | 363 | VCC | maker-VaccDscf16-augustus-gene-381.32-mRNA-1          | 366  | F3H    | 90 | 346 | 95  |
| VVI | NP_001268034.1 | 363 | VCC | maker-VaccDscf30-augustus-gene-297.38-mRNA-1          | 359  | F3H    | 85 | 363 | 101 |
| VVI | NP_001268034.1 | 363 | VCC | maker-VaccDscf31-augustus-gene-324.32-mRNA-1          | 366  | F3H    | 87 | 346 | 95  |
| VVI | NP_001268034.1 | 363 | VCC | maker-VaccDscf32-augustus-gene-323.35-mRNA-1          | 359  | F3H    | 85 | 363 | 101 |
| VVI | NP_001268034.1 | 363 | VCC | snap_masked-VaccDscf18-processed-gene-15.24-mRNA-1    | 373  | F3H    | 85 | 353 | 95  |
| VVI | NP_001268034.1 | 363 | VCC | snap_masked-VaccDscf7-processed-gene-48.23-mRNA-1     | 373  | F3H    | 86 | 353 | 95  |
| TCC | XP_017971349.1 | 339 | VCC | maker-VaccDscf14-augustus-gene-252.26-mRNA-1          | 351  | LAR    | 72 | 333 | 95  |
| TCC | XP_017971349.1 | 339 | VCC | maker-VaccDscf19-augustus-gene-121.20-mRNA-1          | 347  | LAR    | 72 | 347 | 100 |
| TCC | XP_017971349.1 | 339 | VCC | maker-VaccDscf2-augustus-gene-298.20-mRNA-1           | 351  | LAR    | 72 | 333 | 95  |
| TCC | XP_017971349.1 | 339 | VCC | maker-VaccDscf20-augustus-gene-119.25-mRNA-1          | 350  | LAR    | 73 | 347 | 99  |
| TCC | XP_017971349.1 | 339 | VCC | maker-VaccDscf25-augustus-gene-293.25-mRNA-1          | 351  | LAR    | 72 | 333 | 95  |
| TCC | XP_017971349.1 | 339 | VCC | maker-VaccDscf28-augustus-gene-227.23-mRNA-1          | 350  | LAR    | 72 | 347 | 99  |
| TCC | XP_017971349.1 | 339 | VCC | maker-VaccDscf28-augustus-gene-232.26-mRNA-1          | 350  | LAR    | 73 | 347 | 99  |



|     |                |     |     |                                                |     |     |    |     |     |
|-----|----------------|-----|-----|------------------------------------------------|-----|-----|----|-----|-----|
| TCC | XP_017971349.1 | 339 | VCC | maker-VaccDscaff3-augustus-gene-115.16-mRNA-1  | 352 | LAR | 72 | 334 | 95  |
| VVI | NP_001268089.1 | 362 | VCC | maker-VaccDscaff35-augustus-gene-247.32-mRNA-1 | 341 | LAR | 67 | 346 | 101 |
| VVI | NP_001268089.1 | 362 | VCC | maker-VaccDscaff36-augustus-gene-103.16-mRNA-1 | 351 | LAR | 68 | 351 | 100 |
| TCC | XP_017973773.1 | 359 | VCC | maker-VaccDscaff4-augustus-gene-340.14-mRNA-1  | 203 | LAR | 74 | 182 | 90  |
| VVI | NP_001268089.1 | 362 | VCC | maker-VaccDscaff9-augustus-gene-315.13-mRNA-1  | 346 | LAR | 69 | 346 | 100 |

PAs: proanthocyanidins, KEGG: Kyoto Encyclopedia of Genes and Genomes.
